# Supplementary material for: Risk-factors for nodular hyperplasia of parathyroid glands in sHPT patients
Source: PLOS journal article supplement (doi:10.1371/journal.pone.0186093), 2017-10-17

**PG detected by surgery  
and confirmed by pathology**

**no detection by US**

**PG detected by US and verified  
by interdisciplinary correlation**

**cut-off probability**

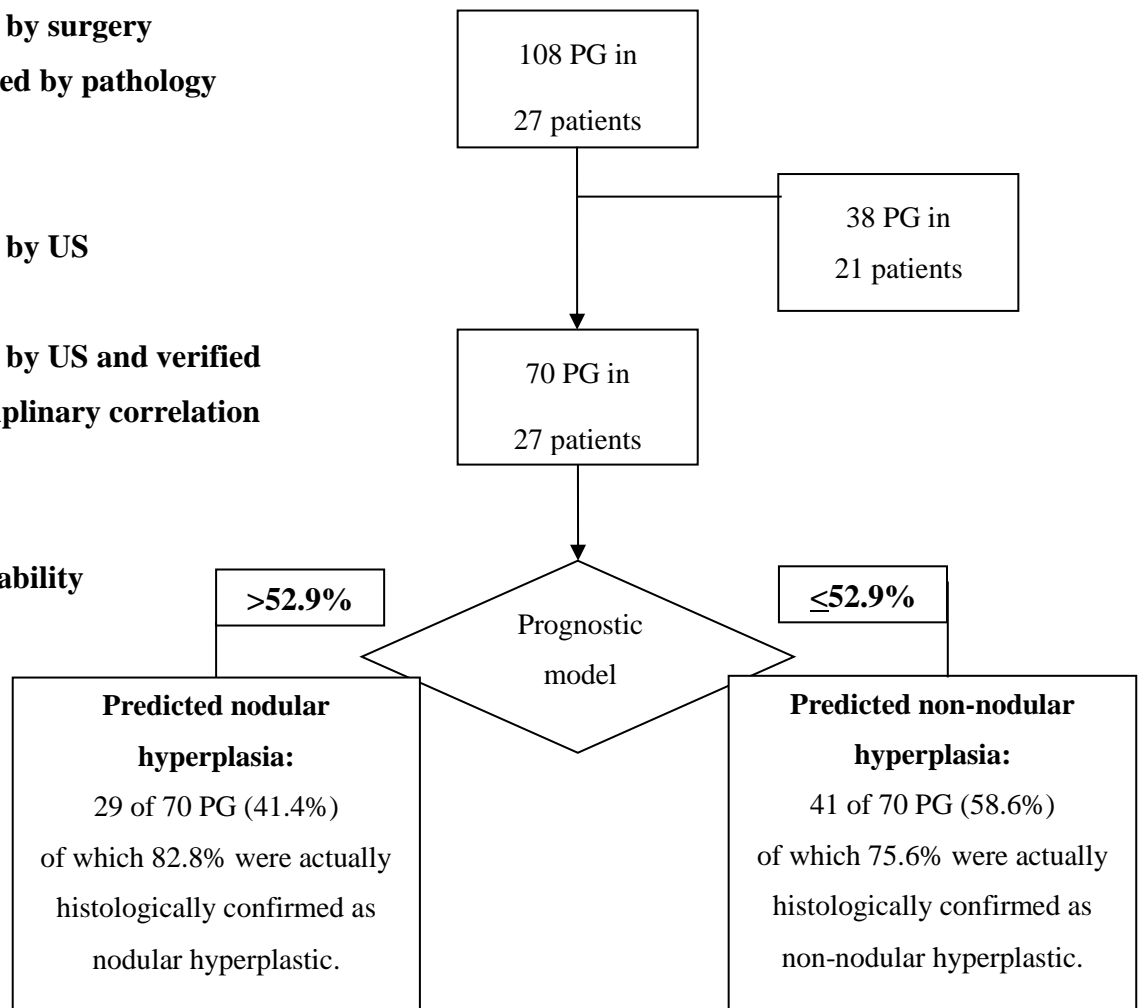

Supplement: S1 (10.1371/journal.pone.0186093.s001) [file journal.pone.0186093.s001]
